# Supplementary material
Source: publisher figshare collection journal article supplement (https://karger.figshare.com/articles/dataset/_/14375915)
Supplement: Supplementary file 1 [file 1]

# SUPPLEMENTARY TABLES

**Supplementary table 1. Frequency of *spa*-types in nose and skin**

| <i>Spa</i> -type | All isolates<br>current study, n<br>(%) | Nose isolates<br>current study, n<br>(%) | Skin isolates<br>current study, n<br>(%) | World<br>frequency(1),<br>(%) | Nasal isolates in<br>general<br>European<br>population, (%) | Skin isolates in<br>AD populations,<br>(%) |
|------------------|-----------------------------------------|------------------------------------------|------------------------------------------|-------------------------------|-------------------------------------------------------------|--------------------------------------------|
| t002             | 30 (10,3)                               | 15 (9,6)                                 | 15 (11,3)                                | 6,6                           |                                                             | 2,7(2) 5,0(3)                              |
| t005             | 4 (1,4)                                 | 2 (1,3)                                  | 2 (1,5)                                  | 0,7                           | 2,8(4)                                                      |                                            |
| t008             | 13 (4,5)                                | 8 (5,1)                                  | 5 (3,8)                                  | 5,9                           | 5,1(4)                                                      | 5,1(3)                                     |
| t012             | 2 (0,7)                                 | 1 (0,6)                                  | 1 (0,8)                                  | 1,5                           | 8,4(5) 6,2(4)<br>5,2(6)                                     | 2,2(3)                                     |
| t015             | 4 (1,4)                                 | 4 (2,5)                                  | -                                        | 1,0                           | 4,6(4)                                                      | 0,1(3)                                     |
| t019             | 1 (0,3)                                 | 1 (0,6)                                  | -                                        | 1,0                           |                                                             |                                            |
| t021             | 11 (3,8)                                | 6 (3,8)                                  | 5 (3,8)                                  | 1,1                           | 4,0(4)                                                      |                                            |
| t024             | 1 (0,3)                                 | -                                        | 1 (0,8)                                  | 0,7                           |                                                             |                                            |
| t026             | 5 (1,7)                                 | 3 (1,9)                                  | 2 (1,5)                                  | 0,5                           |                                                             | 0,1(3)                                     |

|       |          |          |          |     |               |                |
|-------|----------|----------|----------|-----|---------------|----------------|
| t050  | 1 (0,3)  | 1 (0.6)  | -        | 0,2 |               |                |
| t065  | 3 (1,0)  | 2 (1.3)  | 1 (0.8)  | 0,5 | 4.9(5)        | 6,2(3)         |
| t084  | 14 (4,8) | 6 (3,8)  | 8 (6,0)  | 1,7 | 7.6(5) 7,7(6) | 2,7(2) 5,4(3)  |
| t091  | 23 (7,9) | 14 (8,9) | 9 (6,8)  | 1,0 | 5,2(4) 6,1(6) | 1,0(3)         |
| t100  | 3 (1,0)  | 2 (1.3)  | 1 (0.8)  | 0,0 |               |                |
| t127  | 22 (7,6) | 12 (7,6) | 10 (7,5) | 2,6 |               | 13,9(2) 2,1(3) |
| t1293 | 1 (0,3)  | 1 (0.6)  | -        | 0,0 |               |                |
| t1307 | 1 (0,3)  | -        | 1 (0.8)  | 0,0 |               |                |
| t1346 | 5 (1,7)  | 3 (1,9)  | 2 (1.5)  | 0,0 |               |                |
| t1451 | 1 (0,3)  | 1 (0.6)  | -        | 0,2 |               |                |
| t148  | 5 (1,7)  | 2 (1.3)  | 3 (2,3)  | 0,3 |               | 2,7(2)         |
| t1504 | 2 (0,7)  | 2 (1.3)  | -        | 0,0 |               |                |
| t160  | 7 (2,4)  | 3 (1,9)  | 4 (3,0)  | 0,3 |               |                |
| t1601 | 1 (0,3)  | 1 (0.6)  | -        | 0,0 |               |                |
| t164  | 4 (1,4)  | 2 (1.3)  | 2 (1.5)  | 0,2 |               | 11,1(2)        |
| t189  | 18 (6,2) | 7 (4,5)  | 11 (8,3) | 0,6 |               | 19,4(2) 3,0(3) |

|       |          |          |         |     |  |               |
|-------|----------|----------|---------|-----|--|---------------|
| t1994 | 4 (1,4)  | 2 (1.3)  | 2 (1.5) | 0,0 |  |               |
| t216  | 3 (1,0)  | 2 (1.3)  | 1 (0.8) | 0,4 |  |               |
| t2246 | 3 (1,0)  | 2 (1.3)  | 1 (0.8) | 0   |  |               |
| t230  | 6 (2,1)  | 2 (1.3)  | 4 (3,0) | 0,4 |  |               |
| t275  | 2 (0,7)  | 2 (1.3)  | -       | 0,1 |  |               |
| t2973 | 3 (1,0)  | 1 (0.6)  | 2 (1.5) | 0,0 |  |               |
| t346  | 9 (3,1)  | 4 (2,5)  | 5 (3,8) | 0,3 |  | 2,7(2) 1,0(3) |
| t363  | 4 (1,4)  | 2 (1.3)  | 2 (1.5) | 0,1 |  |               |
| t369  | 1 (0,3)  | 1 (0.6)  | -       | 0,0 |  |               |
| t398  | 4 (1,4)  | 2 (1.3)  | 2 (1.5) | 0,1 |  |               |
| t445  | 2 (0,7)  | 2 (1.3)  | -       | 0,0 |  |               |
| t458  | 2 (0,7)  | -        | 2 (1.5) | 0,1 |  |               |
| t491  | 1 (0,3)  | 1 (0.6)  | -       | 0,1 |  | 1,0(3)        |
| t5078 | 1 (0,3)  | 1 (0.6)  | -       | 0,0 |  |               |
| t559  | 2 (0,7)  | 1 (0.6)  | 1 (0.8) | 0,0 |  |               |
| t571  | 19 (6,6) | 10 (6,4) | 9 (6,8) | 0,4 |  |               |

|                |             |             |             |     |  |        |
|----------------|-------------|-------------|-------------|-----|--|--------|
| t6587          | 1 (0,3)     | 1 (0.6)     | -           | 0,0 |  |        |
| t686           | 4 (1,4)     | 2 (1.3)     | 2 (1.5)     | 0,0 |  |        |
| t693           | 2 (0,7)     | 1 (0.6)     | 1 (0.8)     | 0,1 |  |        |
| t774           | 1 (0,3)     | 1 (0.6)     | -           | 0,1 |  | 1,0(3) |
| t803           | 5 (1,7)     | 2 (1.3)     | 3 (2,3)     | 0,1 |  |        |
| t837           | 7 (2,4)     | 4 (2,5)     | 3 (2,3)     | 0,0 |  |        |
| t854           | 2 (0,7)     | 2 (1.3)     | -           | 0,0 |  |        |
| t975           | 1 (0,3)     | 1 (0.6)     | -           | 0,0 |  |        |
| t9252          | 3 (1,0)     | 2 (1.3)     | 1 (0.8)     | -   |  |        |
| t9253          | 4 (1,4)     | 2 (1.3)     | 2 (1.5)     | -   |  |        |
| t9254          | 1 (0,3)     | -           | 1 (0.8)     | -   |  |        |
| t19255         | 4 (1,4)     | 2 (1.3)     | 2 (1.5)     | -   |  |        |
| unknown1       | 1 (0,3)     | -           | 1 (0.8)     | -   |  |        |
| unknown2       | 1 (0,3)     | -           | 1 (0.8)     | -   |  |        |
| Sample missing | 5 (1,7)     | 3 (1,9)     | 2 (1.5)     | -   |  |        |
| Total          | 290 (100,0) | 157 (100,0) | 133 (100,0) | -   |  |        |

Column 2, 3 and 4 represent data from this present study and are collected during both time-points. The marked cells represent the five most common spa-types. Column 5 represent the world's prevalence of *spa*-types as registered by the *ridom spa-server*. Column 6 represents the prevalence of spa-types in the nose as described by previous publications on the presence in the general European populations. Column 7 represents the prevalence of spa-types on the skin as described by previous publications on the presence in AD populations

**Supplementary table 2. *Staphylococcus aureus* load in nose and skin at both time-points**

|                                                                                                                                                                                                                                                                                                                                                                                | T0        | T1        | P-value <sup>1</sup> |
|--------------------------------------------------------------------------------------------------------------------------------------------------------------------------------------------------------------------------------------------------------------------------------------------------------------------------------------------------------------------------------|-----------|-----------|----------------------|
| Nose n(%)                                                                                                                                                                                                                                                                                                                                                                      |           |           | P<0.03               |
| Load 1                                                                                                                                                                                                                                                                                                                                                                         | 19 (24.4) | 21 (27.3) |                      |
| Load 2                                                                                                                                                                                                                                                                                                                                                                         | 31 (39.7) | 33 (42.9) |                      |
| Load 3                                                                                                                                                                                                                                                                                                                                                                         | 26 (33.3) | 18 (23.4) |                      |
| Load 4                                                                                                                                                                                                                                                                                                                                                                         | 2 (2.6)   | 5 (6.5)   |                      |
| <i>Total</i>                                                                                                                                                                                                                                                                                                                                                                   | 78        | 77        |                      |
| Skin n(%)                                                                                                                                                                                                                                                                                                                                                                      |           |           | P=0.04               |
| Load 1                                                                                                                                                                                                                                                                                                                                                                         | 22 (31.4) | 24 (38.7) |                      |
| Load 2                                                                                                                                                                                                                                                                                                                                                                         | 24 (34.3) | 30 (48.4) |                      |
| Load 3                                                                                                                                                                                                                                                                                                                                                                         | 16 (22.9) | 7 (11.3)  |                      |
| Load 4                                                                                                                                                                                                                                                                                                                                                                         | 8 (11.4)  | 1 (1.6)   |                      |
| <i>Total</i>                                                                                                                                                                                                                                                                                                                                                                   | 70        | 62        |                      |
| <p>Abbreviations: n, number; T0, time-point at baseline; T1, time-point two weeks after baseline.</p> <p>Results on <i>S. aureus</i> load were determined using bacterial semi-quantitative cultures and reported on a categorical scale ranging from 0 (negative) to 4 (strongly positive).</p> <p><sup>1</sup> Statistical testing was performed using a Chi-square test</p> |           |           |                      |

## REFERENCES SUPPLEMENTARY MATERIAL:

1. GmbH R. [updated December 2005. Available from: <https://www.spaserver.ridom.de/>.
2. Kim DW, Park JY, Park KD, Kim TH, Lee WJ, Lee SJ, et al. Are there predominant strains and toxins of *Staphylococcus aureus* in atopic dermatitis patients? Genotypic characterization and toxin determination of *S. aureus* isolated in adolescent and adult patients with atopic dermatitis. *J Dermatol.* 2009;36(2):75-81.
3. Yeung M, Balma-Mena A, Shear N, Simor A, Pope E, Walsh S, et al. Identification of major clonal complexes and toxin producing strains among *Staphylococcus aureus* associated with atopic dermatitis. *Microbes Infect.* 2011;13(2):189-97.
4. Holtfreter S, Grumann D, Balau V, Barwich A, Kolata J, Goehler A, et al. Molecular Epidemiology of *Staphylococcus aureus* in the General Population in Northeast Germany: Results of the Study of Health in Pomerania (SHIP-TREND-0). *J Clin Microbiol.* 2016;54(11):2774-85.
5. Sangvik M, Olsen RS, Olsen K, Simonsen GS, Furberg AS, Sollid JU. Age- and gender-associated *Staphylococcus aureus* spa types found among nasal carriers in a general population: the Tromsø Staph and Skin Study. *J Clin Microbiol.* 2011;49(12):4213-8.
6. Becker K, Schaumburg F, Fegeler C, Friedrich AW, Kock R, Prevalence of Multiresistant Microorganisms PMMS. *Staphylococcus aureus* from the German general population is highly diverse. *Int J Med Microbiol.* 2017;307(1):21-7.
